# Supplementary material for: Heteroleptic Cu(i) bis-diimine complexes as sensitizers in dye-sensitized solar cells (DSSCs): on some factors affecting intramolecular charge transfer
Source: Royal Society of Chemistry journal article supplement (doi:10.1039/d2cp01880b), 2022-01-01
Supplement: d2cp01880b1.pdf [file d2cp01880b1.pdf]

**Table S1** Selected bond lengths (Angstroms), bond angles (degrees), and dihedral angles (degrees) (computed using the B3LYP functional) for the Cu(I) dyes, in solvent. Expt denotes the experimental values (Ref. 11,14) for the corresponding homoleptic dyes of type  $[\text{CuL}_2]^+$ , where L=6,6'-dimethyl-2,2'-bipyridine-dimethylformate).

| Parameter | Dye1   | Dye2   | Dye3   | Dye4   | Dye5   | Dye6   | expt (Ref. 11,14) |
|-----------|--------|--------|--------|--------|--------|--------|-------------------|
| Cu-N1     | 2.08   | 2.08   | 2.09   | 2.09   | 2.08   | 2.09   | 2.01              |
| Cu-N2     | 2.08   | 2.08   | 2.09   | 2.08   | 2.08   | 2.08   | 2.01              |
| Cu-N3     | 2.08   | 2.07   | 2.09   | 2.09   | 2.10   | 2.09   | 2.04              |
| Cu-N4     | 2.08   | 2.07   | 2.09   | 2.09   | 2.10   | 2.10   | 2.00              |
| N1-Cu-N2  | 80.08  | 80.24  | 80.34  | 80.37  | 80.33  | 80.37  | 80.93             |
| N2-Cu-N3  | 125.99 | 125.55 | 119.92 | 119.84 | 119.72 | 120.18 | 119.26            |
| N3-Cu-N4  | 81.11  | 80.78  | 81.09  | 81.14  | 80.95  | 80.01  | 81.21             |
| N1-Cu-N4  | 125.95 | 126.03 | 119.39 | 119.09 | 119.64 | 118.71 | 134.76            |
| N2-Cu-N4  | 125.25 | 125.64 | 131.88 | 131.87 | 131.90 | 132.01 | 122.14            |
| N1-Cu-N3  | 125.05 | 125.26 | 131.70 | 132.04 | 131.80 | 132.13 | 123.77            |
| $\tau_4$  | 0.77   | 0.79   | 0.68   | 0.68   | 0.68   | 0.68   | -                 |

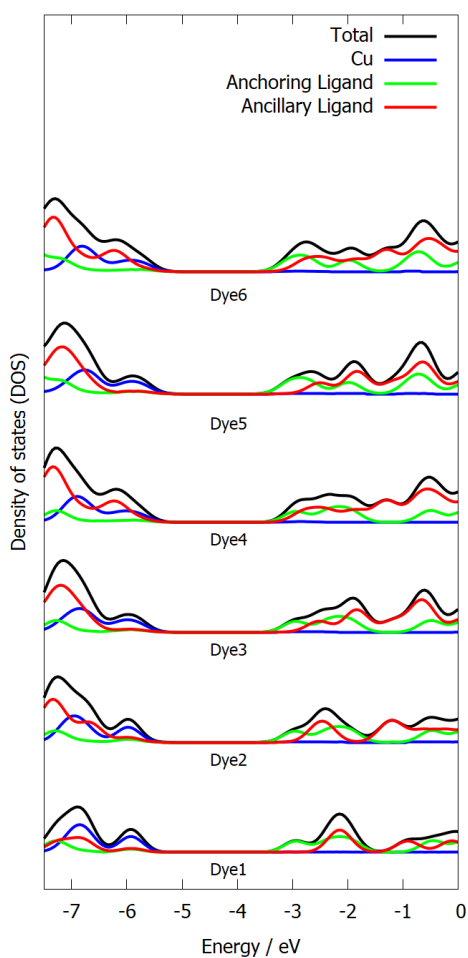

**Figure S1** Projected Density of States (PDOS)(using the B3LYP functional) of the Cu(I) dyes, in solvent.

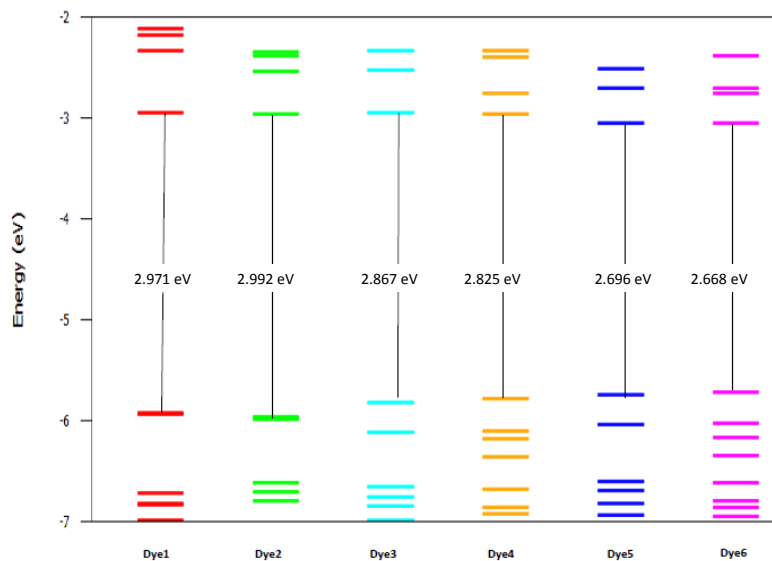

Figure S2 Kohn- Sham energy levels (using the B3LYP functional) for the Cu(I) dyes, in solvent.

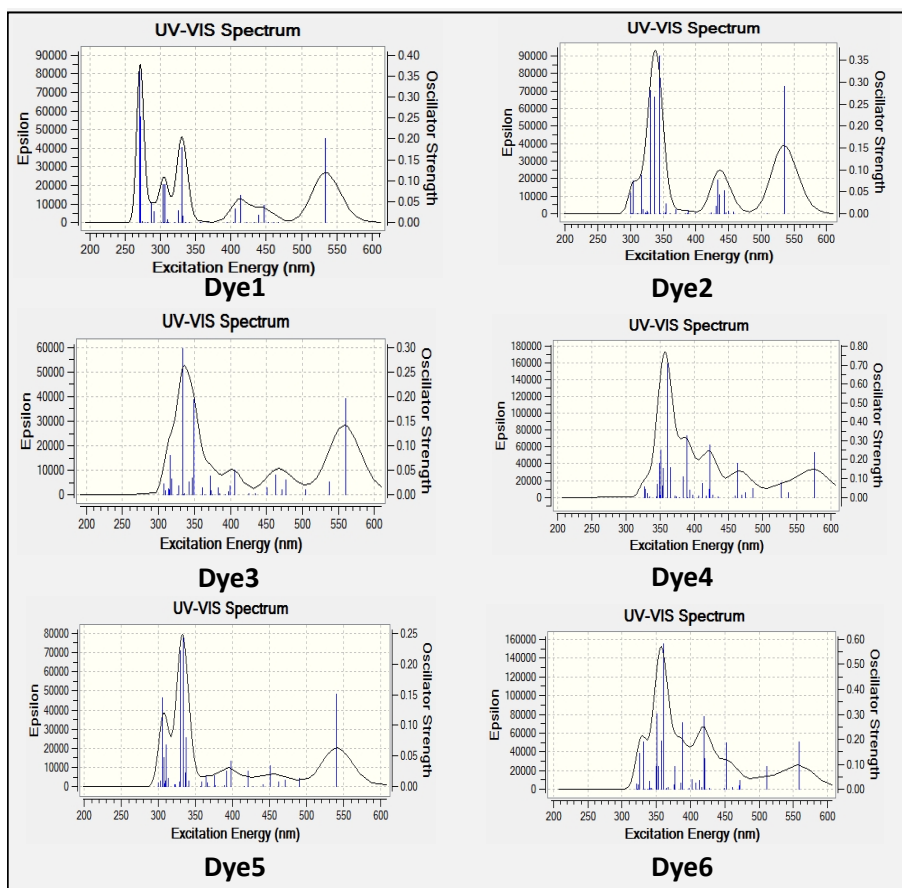

Figure S3 Optical Absorption Spectra (using the B3LYP functional) of the Cu(I) dyes, in solvent.

**Table S2** Optical data corresponding to the theoretical absorption spectra (using the B3LYP functional) for the Cu(I) dyes, in solvent. ESN denotes the transition from the single ground state  $S_0$  to the singlet excited state  $S_N$ . Only the transitions with oscillator strength  $f \geq 0.1$  have been included in the table.

| System | Transitions                      | Excitation energy(eV) | Wavelength(nm)( $\lambda$ ) | Oscillator strength (f) |
|--------|----------------------------------|-----------------------|-----------------------------|-------------------------|
| Dye1   | ES2( $S_0 \rightarrow S_2$ )     | 2.32                  | 533.95                      | 0.20                    |
|        | ES10( $S_0 \rightarrow S_{10}$ ) | 2.99                  | 413.88                      | 0.06                    |
|        | ES21( $S_0 \rightarrow S_{21}$ ) | 3.74                  | 331.02                      | 0.18                    |
|        | ES22( $S_0 \rightarrow S_{22}$ ) | 3.74                  | 330.77                      | 0.11                    |
| Dye2   | ES2( $S_0 \rightarrow S_2$ )     | 2.31                  | 534.88                      | 0.29                    |
|        | ES9( $S_0 \rightarrow S_9$ )     | 2.85                  | 433.65                      | 0.08                    |
|        | ES22( $S_0 \rightarrow S_{22}$ ) | 3.59                  | 344.64                      | 0.36                    |
|        | ES23( $S_0 \rightarrow S_{23}$ ) | 3.68                  | 336.75                      | 0.27                    |
|        | ES24( $S_0 \rightarrow S_{24}$ ) | 3.75                  | 330.19                      | 0.28                    |
| Dye3   | ES1( $S_0 \rightarrow S_1$ )     | 1.84                  | 672.74                      | 0.04                    |
|        | ES2( $S_0 \rightarrow S_2$ )     | 2.21                  | 559.77                      | 0.20                    |
|        | ES23( $S_0 \rightarrow S_{23}$ ) | 3.55                  | 349.25                      | 0.19                    |
|        | ES28( $S_0 \rightarrow S_{28}$ ) | 3.71                  | 333.67                      | 0.30                    |
| Dye4   | ES1( $S_0 \rightarrow S_1$ )     | 1.84                  | 673.53                      | 0.07                    |
|        | ES2( $S_0 \rightarrow S_2$ )     | 2.15                  | 575.64                      | 0.24                    |
|        | ES4( $S_0 \rightarrow S_4$ )     | 2.35                  | 526.83                      | 0.08                    |
|        | ES8( $S_0 \rightarrow S_8$ )     | 2.67                  | 463.25                      | 0.18                    |
|        | ES11( $S_0 \rightarrow S_{11}$ ) | 2.90                  | 426.15                      | 0.01                    |
|        | ES12( $S_0 \rightarrow S_{12}$ ) | 2.93                  | 422.96                      | 0.28                    |
|        | ES21( $S_0 \rightarrow S_{21}$ ) | 3.19                  | 388.39                      | 0.32                    |
|        | ES23( $S_0 \rightarrow S_{23}$ ) | 3.23                  | 383.53                      | 0.11                    |
|        | ES27( $S_0 \rightarrow S_{27}$ ) | 3.39                  | 365.40                      | 0.16                    |
|        | ES28( $S_0 \rightarrow S_{28}$ ) | 3.44                  | 360.39                      | 0.71                    |
|        | ES29( $S_0 \rightarrow S_{29}$ ) | 3.50                  | 353.54                      | 0.15                    |
|        | ES31( $S_0 \rightarrow S_{31}$ ) | 3.53                  | 350.27                      | 0.25                    |
|        | ES33( $S_0 \rightarrow S_{33}$ ) | 3.56                  | 348.12                      | 0.18                    |
| Dye5   | ES1( $S_0 \rightarrow S_1$ )     | 1.90                  | 649.22                      | 0.02                    |
|        | ES2( $S_0 \rightarrow S_2$ )     | 2.29                  | 540.39                      | 0.15                    |
|        | ES22( $S_0 \rightarrow S_{22}$ ) | 3.67                  | 337.33                      | 0.19                    |
|        | ES26( $S_0 \rightarrow S_{26}$ ) | 3.76                  | 329.65                      | 0.04                    |
| Dye6   | ES1( $S_0 \rightarrow S_1$ )     | 1.90                  | 650.20                      | 0.06                    |
|        | ES2( $S_0 \rightarrow S_2$ )     | 2.22                  | 558.49                      | 0.19                    |
|        | ES7( $S_0 \rightarrow S_7$ )     | 2.74                  | 452.43                      | 0.19                    |
|        | ES10( $S_0 \rightarrow S_{10}$ ) | 2.94                  | 420.91                      | 0.12                    |
|        | ES11( $S_0 \rightarrow S_{11}$ ) | 2.95                  | 419.50                      | 0.29                    |
|        | ES18( $S_0 \rightarrow S_{18}$ ) | 3.19                  | 387.65                      | 0.27                    |
|        | ES20( $S_0 \rightarrow S_{20}$ ) | 3.23                  | 383.53                      | 0.11                    |
|        | ES24( $S_0 \rightarrow S_{24}$ ) | 3.39                  | 365.40                      | 0.16                    |
|        | ES25( $S_0 \rightarrow S_{25}$ ) | 3.44                  | 360.39                      | 0.71                    |
|        | ES26( $S_0 \rightarrow S_{26}$ ) | 3.50                  | 353.54                      | 0.15                    |
|        | ES27( $S_0 \rightarrow S_{27}$ ) | 3.51                  | 352.53                      | 0.06                    |

**Table S3** Optical data corresponding to the theoretical absorption spectra (using the CAM-B3LYP functional) of the Cu(I) dyes, in solvent. ESN denotes the transition from the singlet ground state  $S_0$  to the singlet excited state  $S_N$ . Only the transitions with oscillator strength  $f \geq 0.1$  have been included in the table.

| System                           | Transitions                      | Excitation energy(eV)        | Wavelength(nm)( $\lambda$ ) | Oscillator strength (f) |
|----------------------------------|----------------------------------|------------------------------|-----------------------------|-------------------------|
| Dye1                             | ES1( $S_0 \rightarrow S_1$ )     | 2.67                         | 462.80                      | 0.00                    |
|                                  | ES2( $S_0 \rightarrow S_2$ )     | 3.08                         | 402.94                      | 0.20                    |
|                                  | ES13( $S_0 \rightarrow S_{13}$ ) | 4.20                         | 295.15                      | 0.40                    |
|                                  | ES24( $S_0 \rightarrow S_{24}$ ) | 4.92                         | 251.75                      | 0.75                    |
| Dye2                             | ES1( $S_0 \rightarrow S_1$ )     | 2.72                         | 455.20                      | 0.00                    |
|                                  | ES2( $S_0 \rightarrow S_2$ )     | 3.09                         | 400.81                      | 0.29                    |
|                                  | ES9( $S_0 \rightarrow S_9$ )     | 3.86                         | 320.92                      | 0.19                    |
|                                  | ES16( $S_0 \rightarrow S_{16}$ ) | 4.20                         | 295.16                      | 0.40                    |
|                                  | ES19( $S_0 \rightarrow S_{22}$ ) | 4.34                         | 285.67                      | 0.31                    |
|                                  | ES20( $S_0 \rightarrow S_{22}$ ) | 4.47                         | 277.08                      | 0.43                    |
|                                  | ES22( $S_0 \rightarrow S_{22}$ ) | 4.68                         | 264.98                      | 0.28                    |
| Dye2a                            | ES1( $S_0 \rightarrow S_1$ )     | 2.31                         | 535.51                      | 0.00                    |
|                                  | ES2( $S_0 \rightarrow S_2$ )     | 3.06                         | 404.74                      | 0.29                    |
|                                  | ES5( $S_0 \rightarrow S_5$ )     | 3.62                         | 342.37                      | 0.14                    |
|                                  | ES8( $S_0 \rightarrow S_8$ )     | 3.78                         | 327.77                      | 0.12                    |
|                                  | ES9( $S_0 \rightarrow S_9$ )     | 3.85                         | 322.15                      | 0.18                    |
|                                  | ES15( $S_0 \rightarrow S_{15}$ ) | 4.20                         | 295.02                      | 0.38                    |
|                                  | ES19( $S_0 \rightarrow S_{19}$ ) | 4.33                         | 285.90                      | 0.25                    |
|                                  | ES24( $S_0 \rightarrow S_{24}$ ) | 4.76                         | 260.17                      | 0.53                    |
| Dye2b                            | ES1( $S_0 \rightarrow S_1$ )     | 2.44                         | 508.03                      | 0.00                    |
|                                  | ES3( $S_0 \rightarrow S_3$ )     | 3.23                         | 383.83                      | 0.13                    |
|                                  | ES8( $S_0 \rightarrow S_8$ )     | 3.78                         | 327.83                      | 0.11                    |
|                                  | ES15( $S_0 \rightarrow S_{15}$ ) | 4.19                         | 296.07                      | 0.17                    |
|                                  | ES17( $S_0 \rightarrow S_{17}$ ) | 4.21                         | 294.60                      | 0.30                    |
|                                  | ES18( $S_0 \rightarrow S_{18}$ ) | 4.22                         | 293.99                      | 0.28                    |
|                                  | ES19( $S_0 \rightarrow S_{19}$ ) | 4.37                         | 283.35                      | 0.56                    |
|                                  | ES22( $S_0 \rightarrow S_{22}$ ) | 4.49                         | 275.98                      | 0.40                    |
|                                  | ES31( $S_0 \rightarrow S_{31}$ ) | 4.92                         | 251.66                      | 0.30                    |
|                                  | Dye3                             | ES1( $S_0 \rightarrow S_1$ ) | 2.66                        | 464.64                  |
| ES2( $S_0 \rightarrow S_2$ )     |                                  | 3.07                         | 403.98                      | 0.13                    |
| ES11( $S_0 \rightarrow S_{11}$ ) |                                  | 4.09                         | 303.41                      | 0.18                    |
| ES15( $S_0 \rightarrow S_{15}$ ) |                                  | 4.20                         | 295.43                      | 0.32                    |
| ES17( $S_0 \rightarrow S_{17}$ ) |                                  | 4.27                         | 290.19                      | 0.36                    |
| ES25( $S_0 \rightarrow S_{25}$ ) |                                  | 4.80                         | 258.19                      | 0.60                    |
| Dye4                             |                                  | ES1( $S_0 \rightarrow S_1$ ) | 2.67                        | 462.67                  |
|                                  | ES2( $S_0 \rightarrow S_2$ )     | 3.01                         | 411.94                      | 0.19                    |
|                                  | ES3( $S_0 \rightarrow S_3$ )     | 3.24                         | 382.83                      | 0.15                    |
|                                  | ES4( $S_0 \rightarrow S_4$ )     | 3.47                         | 356.98                      | 0.21                    |
|                                  | ES5( $S_0 \rightarrow S_5$ )     | 3.55                         | 348.88                      | 0.60                    |
|                                  | ES6( $S_0 \rightarrow S_6$ )     | 3.57                         | 347.00                      | 0.46                    |
|                                  | ES10( $S_0 \rightarrow S_{10}$ ) | 3.83                         | 323.36                      | 0.97                    |
|                                  | ES16( $S_0 \rightarrow S_{16}$ ) | 4.13                         | 300.47                      | 0.20                    |
|                                  | ES18( $S_0 \rightarrow S_{18}$ ) | 4.19                         | 295.69                      | 0.13                    |
|                                  | ES19( $S_0 \rightarrow S_{19}$ ) | 4.21                         | 294.78                      | 0.25                    |
|                                  | ES24( $S_0 \rightarrow S_{24}$ ) | 4.71                         | 263.03                      | 0.17                    |
|                                  | ES34( $S_0 \rightarrow S_{34}$ ) | 4.96                         | 249.75                      | 0.30                    |
|                                  | Dye5                             | ES1( $S_0 \rightarrow S_1$ ) | 2.70                        | 459.09                  |
| ES2( $S_0 \rightarrow S_2$ )     |                                  | 3.04                         | 407.22                      | 0.14                    |
| ES12( $S_0 \rightarrow S_{12}$ ) |                                  | 4.02                         | 308.03                      | 0.13                    |
| ES15( $S_0 \rightarrow S_{15}$ ) |                                  | 4.14                         | 299.41                      | 0.28                    |
| ES17( $S_0 \rightarrow S_{17}$ ) |                                  | 4.26                         | 291.06                      | 0.40                    |
| ES23( $S_0 \rightarrow S_{23}$ ) |                                  | 4.71                         | 263.11                      | 0.72                    |
| ES25( $S_0 \rightarrow S_{25}$ ) |                                  | 4.78                         | 259.30                      | 0.39                    |
| Dye6                             | ES1( $S_0 \rightarrow S_1$ )     | 2.70                         | 458.24                      | 0.11                    |
|                                  | ES2( $S_0 \rightarrow S_2$ )     | 2.98                         | 416.26                      | 0.16                    |
|                                  | ES3( $S_0 \rightarrow S_3$ )     | 3.21                         | 385.65                      | 0.27                    |
|                                  | ES5( $S_0 \rightarrow S_5$ )     | 3.55                         | 348.85                      | 0.99                    |
|                                  | ES9( $S_0 \rightarrow S_9$ )     | 3.82                         | 324.09                      | 1.07                    |
|                                  | ES17( $S_0 \rightarrow S_{17}$ ) | 4.09                         | 303.39                      | 0.13                    |
|                                  | ES18( $S_0 \rightarrow S_{18}$ ) | 4.14                         | 299.19                      | 0.29                    |
|                                  | ES25( $S_0 \rightarrow S_{25}$ ) | 4.63                         | 267.69                      | 0.27                    |
|                                  | ES40( $S_0 \rightarrow S_{40}$ ) | 4.99                         | 249.53                      | 0.29                    |

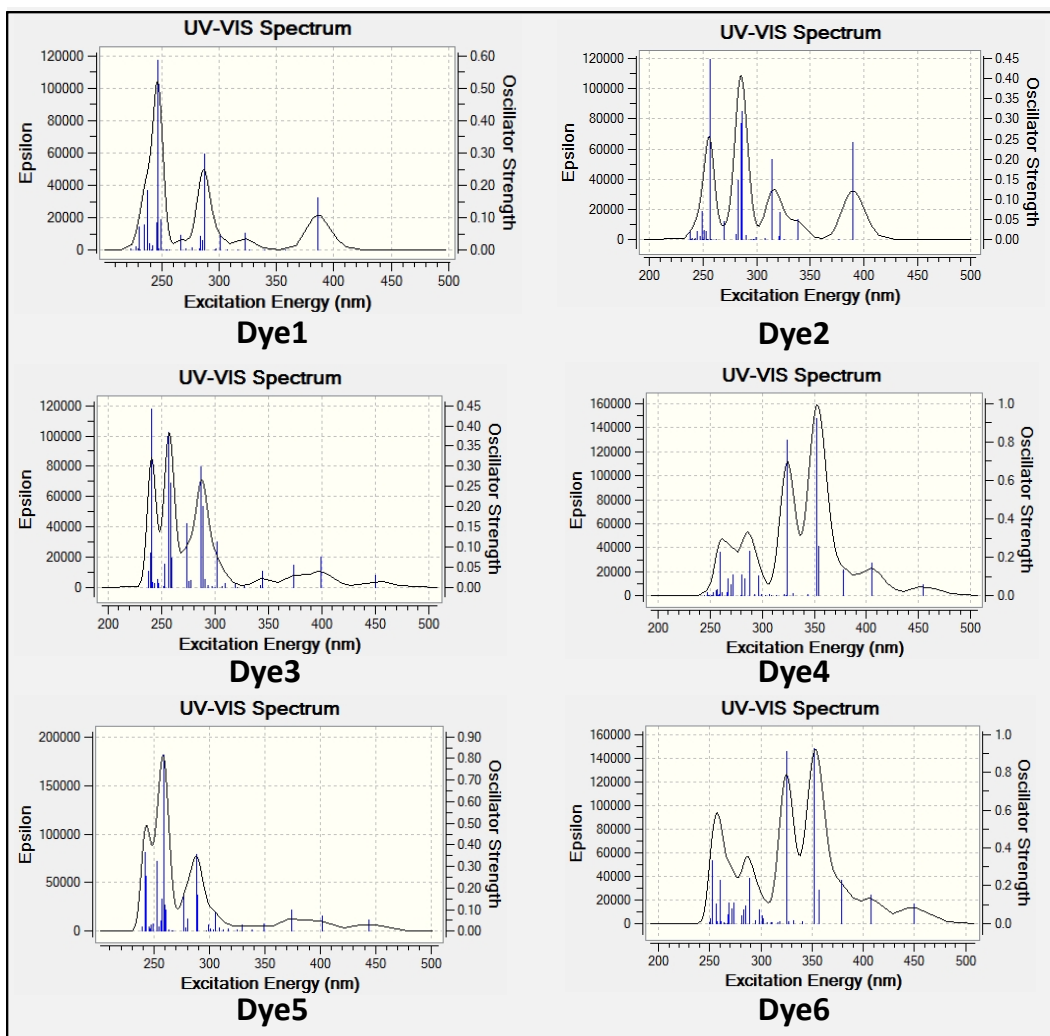

**Figure S4** Optical Absorption Spectra (using the CAM-B3LYP functional) for the Cu(I) dyes, in gas phase.

**Table S4** Optical data corresponding to the theoretical absorption spectra (using the CAM-B3LYP functional) for the Cu(I) dyes, in gas phase. ESN denotes the transition from the single ground state  $S_0$  to the singlet excited state  $S_N$ . Only the transitions with oscillator strength  $f \geq 0.1$  have been included in the table.

| System                           | Transitions                      | Excitation energy(eV)        | Wavelength(nm)( $\lambda$ ) | Oscillator strength (f) |
|----------------------------------|----------------------------------|------------------------------|-----------------------------|-------------------------|
| Dye1                             | ES1( $S_0 \rightarrow S_1$ )     | 2.79                         | 443.33                      | 0.00                    |
|                                  | ES2( $S_0 \rightarrow S_2$ )     | 3.21                         | 386.57                      | 0.16                    |
|                                  | ES13( $S_0 \rightarrow S_{13}$ ) | 4.32                         | 287.05                      | 0.30                    |
|                                  | ES27( $S_0 \rightarrow S_{27}$ ) | 5.03                         | 246.57                      | 0.58                    |
|                                  | ES33( $S_0 \rightarrow S_{33}$ ) | 5.22                         | 237.50                      | 0.18                    |
| Dye2                             | ES1( $S_0 \rightarrow S_1$ )     | 2.79                         | 443.29                      | 0.00                    |
|                                  | ES2( $S_0 \rightarrow S_2$ )     | 3.18                         | 390.05                      | 0.24                    |
|                                  | ES9( $S_0 \rightarrow S_9$ )     | 3.94                         | 314.41                      | 0.20                    |
|                                  | ES16( $S_0 \rightarrow S_{16}$ ) | 4.32                         | 286.93                      | 0.32                    |
|                                  | ES17( $S_0 \rightarrow S_{17}$ ) | 4.34                         | 285.69                      | 0.28                    |
|                                  | ES18( $S_0 \rightarrow S_{18}$ ) | 4.38                         | 283.10                      | 0.14                    |
|                                  | ES24( $S_0 \rightarrow S_{24}$ ) | 4.84                         | 256.37                      | 0.44                    |
| Dye3                             | ES1( $S_0 \rightarrow S_1$ )     | 2.75                         | 450.23                      | 0.03                    |
|                                  | ES11( $S_0 \rightarrow S_{11}$ ) | 4.10                         | 302.23                      | 0.11                    |
|                                  | ES16( $S_0 \rightarrow S_{16}$ ) | 4.29                         | 288.80                      | 0.20                    |
|                                  | ES17( $S_0 \rightarrow S_{17}$ ) | 4.32                         | 286.94                      | 0.30                    |
|                                  | ES20( $S_0 \rightarrow S_{20}$ ) | 4.53                         | 273.63                      | 0.16                    |
|                                  | ES22( $S_0 \rightarrow S_{22}$ ) | 4.79                         | 258.81                      | 0.25                    |
|                                  | ES25( $S_0 \rightarrow S_{25}$ ) | 4.83                         | 256.48                      | 0.38                    |
|                                  | ES36( $S_0 \rightarrow S_{36}$ ) | 5.13                         | 241.26                      | 0.44                    |
| Dye4                             | ES1( $S_0 \rightarrow S_1$ )     | 2.72                         | 454.85                      | 0.06                    |
|                                  | ES2( $S_0 \rightarrow S_2$ )     | 3.06                         | 405.54                      | 0.17                    |
|                                  | ES3( $S_0 \rightarrow S_3$ )     | 3.28                         | 377.85                      | 0.14                    |
|                                  | ES4( $S_0 \rightarrow S_4$ )     | 3.50                         | 354.24                      | 0.26                    |
|                                  | ES5( $S_0 \rightarrow S_5$ )     | 3.52                         | 352.64                      | 0.92                    |
|                                  | ES8( $S_0 \rightarrow S_8$ )     | 3.82                         | 324.18                      | 0.81                    |
|                                  | ES16( $S_0 \rightarrow S_{16}$ ) | 4.18                         | 296.60                      | 0.10                    |
|                                  | ES19( $S_0 \rightarrow S_{19}$ ) | 4.31                         | 287.93                      | 0.23                    |
|                                  | ES21( $S_0 \rightarrow S_{21}$ ) | 4.42                         | 280.20                      | 0.11                    |
|                                  | ES23( $S_0 \rightarrow S_{23}$ ) | 4.56                         | 271.72                      | 0.11                    |
|                                  | ES28( $S_0 \rightarrow S_{28}$ ) | 4.76                         | 260.16                      | 0.22                    |
| Dye5                             | ES1( $S_0 \rightarrow S_1$ )     | 2.78                         | 444.42                      | 0.05                    |
|                                  | ES16( $S_0 \rightarrow S_{16}$ ) | 4.28                         | 289.34                      | 0.17                    |
|                                  | ES17( $S_0 \rightarrow S_{17}$ ) | 4.30                         | 288.31                      | 0.36                    |
|                                  | ES20( $S_0 \rightarrow S_{20}$ ) | 4.48                         | 276.75                      | 0.16                    |
|                                  | ES25( $S_0 \rightarrow S_{25}$ ) | 4.76                         | 259.94                      | 0.12                    |
|                                  | ES26( $S_0 \rightarrow S_{26}$ ) | 4.78                         | 259.17                      | 0.81                    |
|                                  | ES27( $S_0 \rightarrow S_{27}$ ) | 4.82                         | 256.85                      | 0.14                    |
|                                  | ES30( $S_0 \rightarrow S_{30}$ ) | 4.91                         | 252.28                      | 0.32                    |
|                                  | ES37( $S_0 \rightarrow S_{37}$ ) | 5.10                         | 242.67                      | 0.26                    |
|                                  | ES38( $S_0 \rightarrow S_{38}$ ) | 5.12                         | 242.13                      | 0.36                    |
|                                  | Dye6                             | ES1( $S_0 \rightarrow S_1$ ) | 2.75                        | 449.25                  |
| ES1( $S_0 \rightarrow S_1$ )     |                                  | 2.76                         | 449.25                      | 0.10                    |
| ES2( $S_0 \rightarrow S_2$ )     |                                  | 3.04                         | 407.63                      | 0.15                    |
| ES3( $S_0 \rightarrow S_3$ )     |                                  | 3.27                         | 378.74                      | 0.23                    |
| ES4( $S_0 \rightarrow S_4$ )     |                                  | 3.47                         | 357.02                      | 0.18                    |
| ES5( $S_0 \rightarrow S_5$ )     |                                  | 3.52                         | 352.51                      | 0.93                    |
| ES9( $S_0 \rightarrow S_9$ )     |                                  | 3.82                         | 324.91                      | 0.91                    |
| ES19( $S_0 \rightarrow S_{19}$ ) |                                  | 4.29                         | 288.90                      | 0.24                    |
| ES23( $S_0 \rightarrow S_{23}$ ) |                                  | 4.53                         | 273.14                      | 0.10                    |
| ES25( $S_0 \rightarrow S_{25}$ ) |                                  | 4.61                         | 268.48                      | 0.10                    |
| ES31( $S_0 \rightarrow S_{31}$ ) |                                  | 4.75                         | 260.48                      | 0.16                    |
| ES32( $S_0 \rightarrow S_{32}$ ) |                                  | 4.77                         | 259.88                      | 0.23                    |
| ES35( $S_0 \rightarrow S_{35}$ ) |                                  | 4.83                         | 256.66                      | 0.10                    |
| ES37( $S_0 \rightarrow S_{37}$ ) |                                  | 4.91                         | 252.49                      | 0.33                    |

**Table S5** Computed light harvesting efficiency (LHE) (using the B3LYP functional), in the first two singlet excited states, for the Cu(I) dyes, in solvent.

| Copper (I) Dye | $f_1$ | LHE <sub>1</sub> | $f_2$ | LHE <sub>2</sub> | Average LHE |
|----------------|-------|------------------|-------|------------------|-------------|
| Dye1           | 0.00  | 0.00             | 0.20  | 0.37             | 0.18        |
| Dye2           | 0.00  | 0.00             | 0.29  | 0.49             | 0.24        |
| Dye3           | 0.04  | 0.08             | 0.20  | 0.36             | 0.22        |
| Dye4           | 0.07  | 0.15             | 0.24  | 0.42             | 0.29        |
| Dye5           | 0.02  | 0.06             | 0.15  | 0.29             | 0.18        |
| Dye6           | 0.06  | 0.12             | 0.19  | 0.35             | 0.24        |

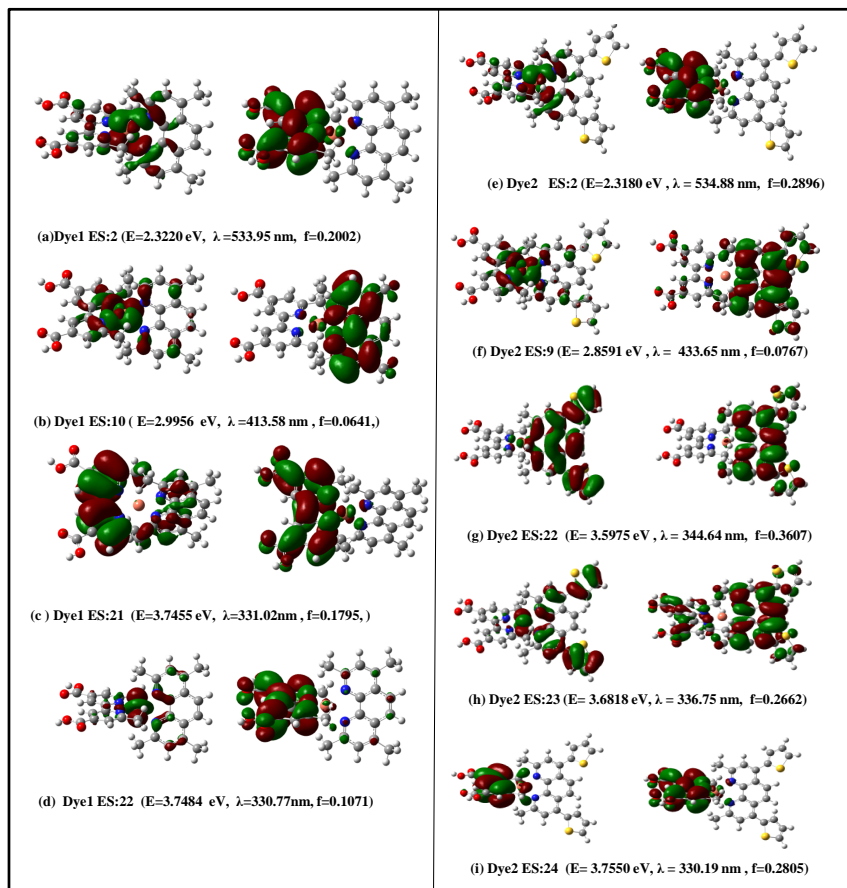

**Figure S5** Natural transition orbitals (NTOs) (using the B3LYP functional), showing the charge transfer upon light absorption, for the Cu(I) dyes, Dye1 (left panel) and Dye2 (right panel), in solvent.

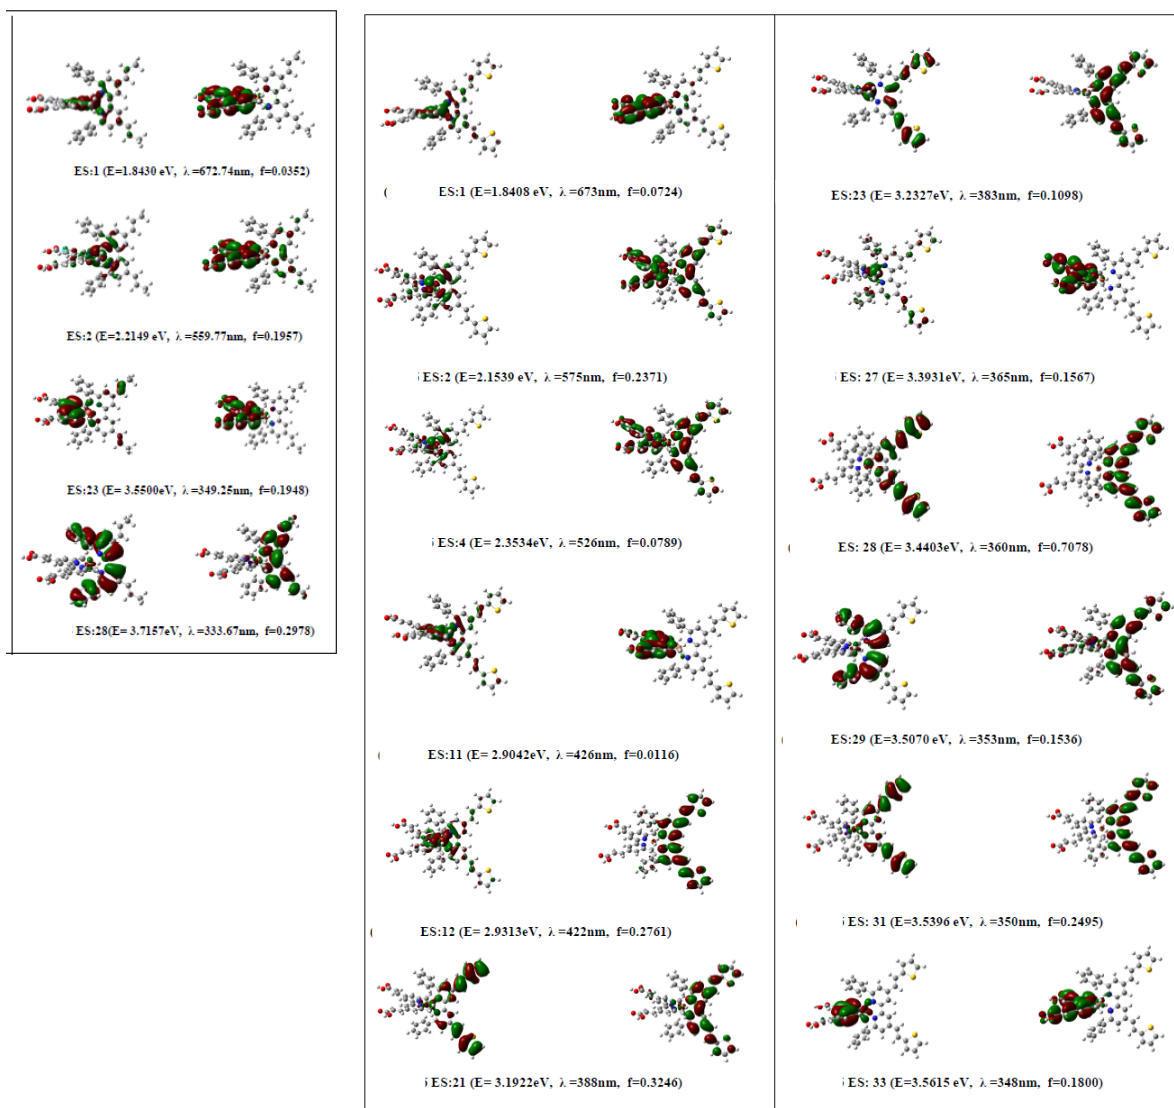

**Figure S6** Natural transition orbitals (NTOs) (using the B3LYP functional), showing the charge transfer upon light absorption, for the Cu(I) dyes, Dye3 (left panel) and Dye4 (right panel), in solvent.



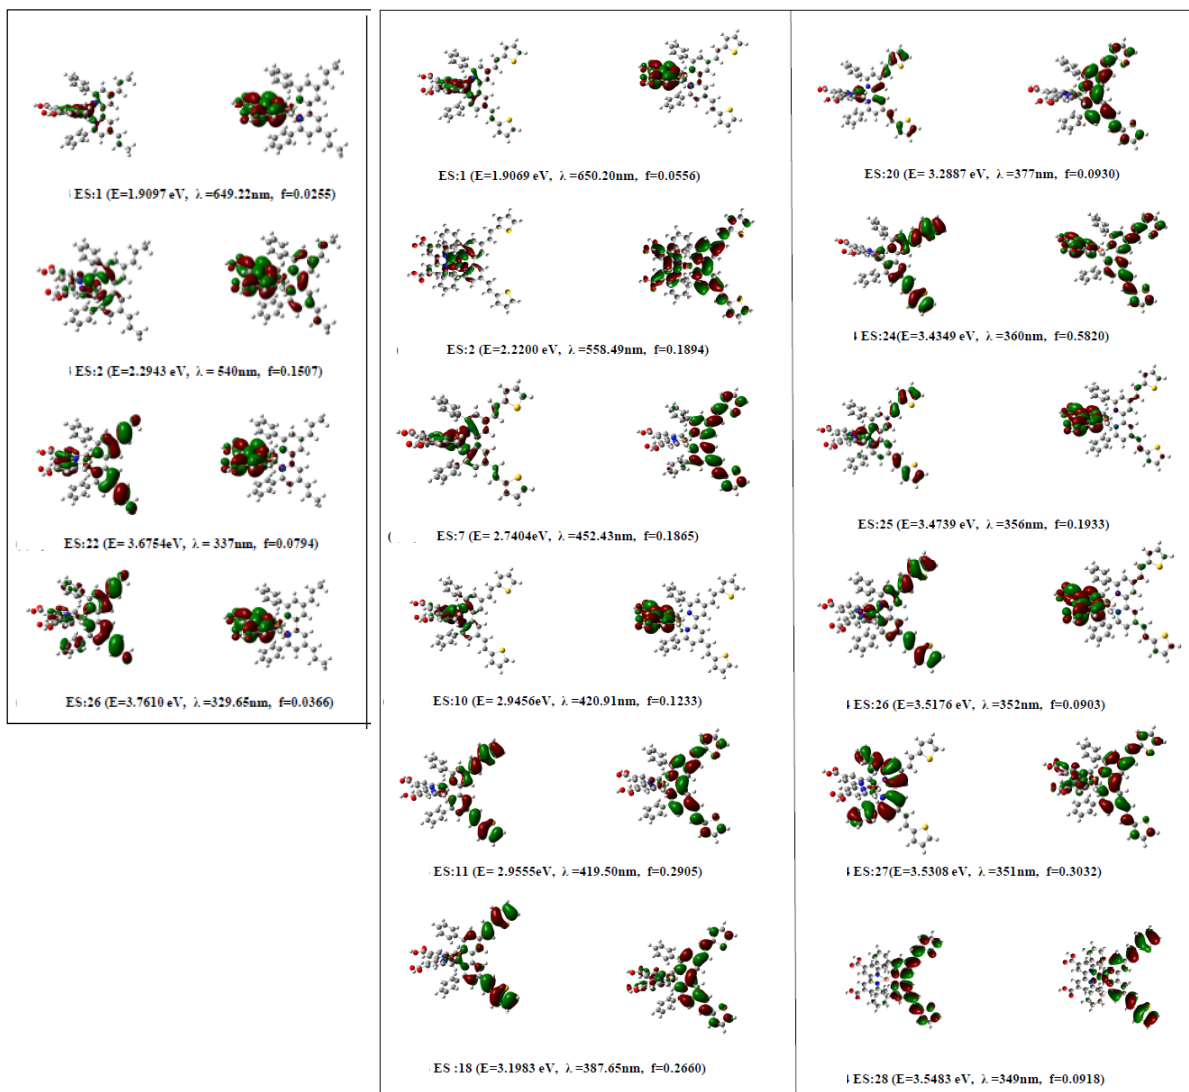

**Figure S7** Natural transition orbitals (NTOs) (using the B3LYP functional), showing the charge transfer upon light absorption, for the Cu(I) dyes, Dye5 (left panel) and Dye6 (right panel), in solvent.

**Table S6** Percentage contributions of the orbitals involved in the charge transfer upon light absorption (using the CAM-B3LYP functional) for the Cu(I) dyes, in solvent.

| Dyes  | excited state | Hole  |      |       |                  |       |       |       |                  |       |     |       |      | Particle |      |       |                  |       |       |      |     |                  |       |      |       |
|-------|---------------|-------|------|-------|------------------|-------|-------|-------|------------------|-------|-----|-------|------|----------|------|-------|------------------|-------|-------|------|-----|------------------|-------|------|-------|
|       |               | Metal |      |       | Anchoring ligand |       |       |       | Ancillary ligand |       |     |       |      | Metal    |      |       | Anchoring ligand |       |       |      |     | Ancillary ligand |       |      |       |
|       |               | Cu-s  | Cu-p | Cu-d  | C-s              | C-p   | N-s   | N-p   | C-s              | C-p   | N-s | N-p   | Cu-s | Cu-p     | Cu-d | C-s   | C-p              | N-s   | N-p   | O-p  | C-s | C-p              | N-s   | N-p  | S-p   |
| Dye1  | ES1           |       | 2.19 | 73.62 |                  | 2.19  | 4.39  | 17.58 |                  | 2.1   |     | 14.9  |      |          | 3.44 |       | 57.47            |       | 32.18 | 4.59 |     |                  | 2.29  |      |       |
|       | ES2           |       |      | 80.8  |                  | 2.1   |       |       |                  |       |     |       |      |          | 2.2  |       | 66.7             |       | 28    | 3.2  |     |                  | 100   |      |       |
|       | ES13          |       |      | 2.2   |                  | 97.8  |       |       |                  |       |     |       |      |          | 2.2  |       | 66.3             |       | 26.1  | 5.4  |     |                  | 74.72 |      | 24.17 |
|       | ES19          |       |      | 15.2  |                  | 76.1  |       | 8.7   |                  |       |     |       |      |          | 1.09 |       |                  |       |       |      |     |                  |       |      |       |
|       | ES24          |       |      | 9.67  |                  |       |       |       |                  | 90.32 |     |       |      |          |      |       |                  |       |       |      |     |                  |       |      |       |
| Dye2  | ES1           |       | 2.15 | 72.04 |                  | 2.15  | 4.30  | 17.20 |                  |       |     |       |      | 3.22     |      | 64.51 |                  | 30.11 |       |      |     | 2.15             |       |      |       |
|       | ES2           |       |      | 82.6  |                  | 2.2   |       |       |                  |       |     |       |      | 4.1      |      | 63.9  |                  | 26.8  | 3.1   |      |     | 2.1              |       |      |       |
|       | ES9           |       |      | 67.8  |                  |       |       | 16.1  |                  | 14.9  | 4.3 | 10.9  |      |          |      | 10    |                  | 4.3   |       |      |     | 73.9             |       | 11.6 |       |
|       | ES16          |       |      | 3.2   |                  | 96.8  |       |       |                  |       |     |       |      | 2.2      |      | 66.7  |                  | 25.8  | 5.4   |      |     |                  |       | 9.1  |       |
|       | ES19          |       | 1.1  | 24.2  |                  |       |       |       |                  | 65.9  |     | 8.8   |      |          |      |       |                  |       |       |      |     | 88.6             |       | 2.3  |       |
|       | ES20          |       |      | 8.3   |                  |       |       |       |                  | 85.4  |     | 6.2   |      |          |      |       |                  |       |       |      |     | 85.4             |       | 4.5  |       |
| Dye2a | ES1           |       |      | 77.01 |                  |       | 4.59  | 18.39 |                  |       |     |       |      |          |      | 59.34 |                  | 30.76 | 3.29  |      |     | 6.59             |       |      |       |
|       | ES2           |       | 3.3  | 79.3  |                  |       |       |       |                  |       |     |       |      | 2.1      |      | 65.3  |                  | 27.4  | 3.2   |      |     | 2.1              |       |      |       |
|       | ES5           |       |      | 63.2  |                  |       |       | 11.5  |                  | 21.8  |     | 3.4   |      | 1.1      |      |       |                  |       |       |      |     | 75.3             |       | 23.6 |       |
|       | ES8           |       | 3.5  | 61.2  |                  |       |       |       |                  | 12.9  |     | 22.4  |      |          |      |       |                  |       |       |      |     | 82.7             |       | 17.3 |       |
|       | ES9           |       | 1.1  | 61.4  |                  |       | 2.3   | 6.8   |                  | 20.4  |     | 8     |      |          |      |       | 11.5             |       | 5.1   | 5.4  |     | 79.5             |       | 3.8  |       |
|       | ES15          |       |      | 2.2   |                  | 97.8  |       |       |                  |       |     |       |      | 2.2      |      | 60.2  |                  | 28.91 | 6.02  |      |     | 6.4              |       |      |       |
| Dye2b | ES1           |       | 2.32 | 76.74 |                  | 4.65  | 16.27 |       |                  |       |     |       |      |          |      | 60.67 |                  | 29.21 | 1.12  |      |     | 8.98             |       |      |       |
|       | ES3           |       | 2.1  | 78.7  |                  |       | 14.9  |       |                  |       |     |       |      | 3.2      |      | 45.7  |                  | 21.3  | 1.1   |      |     | 20.2             |       |      |       |
|       | ES8           |       |      | 67.1  |                  |       | 7.1   |       |                  | 2.1   | 1.1 | 7.1   |      |          |      |       |                  |       |       |      |     | 88.6             | 16.4  | 8.5  |       |
|       | ES15          |       |      | 36    |                  | 1.2   | 7     |       |                  | 1.1   |     | 7     |      |          |      |       |                  |       |       |      |     | 85.9             |       | 11.5 |       |
|       | ES17          |       |      | 30.2  |                  |       | 5.8   |       |                  | 59.3  |     | 7     |      |          |      |       |                  |       |       |      |     | 90.4             |       | 9.6  |       |
|       | ES18          |       | 4.2  | 70.8  |                  | 10.4  | 4.2   |       |                  | 2.1   |     | 8.3   |      |          |      | 62.4  |                  | 18.3  | 8.6   |      |     | 10.8             |       | 4.59 |       |
| Dye3  | ES1           |       | 2.98 | 77.01 |                  | 2.29  | 18.39 |       |                  |       |     |       |      |          |      | 68.13 |                  | 28.57 | 1.09  |      |     | 2                |       |      |       |
|       | ES2           |       |      | 75.3  |                  |       |       |       |                  | 4.3   |     | 12.9  |      |          |      | 28.6  |                  | 6.1   |       |      |     | 49.9             |       | 13.3 |       |
|       | ES11          |       | 5    | 74.1  |                  |       | 4.7   |       |                  | 1.2   | 4.3 | 14.1  |      |          |      |       |                  |       |       |      |     | 82.2             |       | 11.8 |       |
|       | ES15          |       | 3.2  | 96.8  |                  |       |       |       |                  |       |     |       |      |          |      | 61.7  |                  | 23.4  |       |      |     | 12.8             |       |      |       |
|       | ES17          |       |      | 44.9  |                  |       |       |       |                  | 55.1  |     | 2.43  |      |          |      |       |                  |       |       |      |     | 69.4             |       | 24.5 |       |
|       | ES25          |       |      |       |                  | 70.73 | 6.09  |       |                  | 20.73 |     | 2.43  |      |          | 4.1  |       |                  |       | 11    |      |     | 42               |       | 7    |       |
| Dye4  | ES1           |       | 2.32 | 76.74 |                  |       | 16.27 |       |                  |       |     |       |      |          |      | 61.62 |                  | 27.90 | 2.32  |      |     | 5.81             |       |      |       |
|       | ES2           |       | 3.4  | 74.2  |                  | 1.1   | 2.2   | 7.9   |                  |       |     |       |      |          | 1.2  |       | 34.1             |       | 16.5  |      |     | 36.5             |       |      |       |
|       | ES3           |       | 2.2  | 80.2  |                  | 2.2   | 2.2   | 5.5   |                  |       |     |       |      |          | 3.6  |       | 52.4             |       | 24.4  |      |     | 12.2             |       | 11.8 |       |
|       | ES4           |       |      | 79.3  |                  | 1.2   | 2.4   | 11    |                  | 4.9   |     | 1.2   |      |          |      |       | 23.6             |       | 13.9  |      |     | 48.6             |       | 13.9 |       |
|       | ES5           | 2.1   | 5.3  | 88.3  |                  |       |       |       |                  |       |     |       |      |          |      | 60    |                  | 27.4  | 5.3   |      |     | 1                |       |      |       |
|       | ES6           | 2.3   | 6.8  | 85.2  |                  |       |       | 3.4   |                  |       |     | 1.1   |      |          |      | 2.2   |                  | 25.6  | 2.2   |      |     | 5.6              |       |      |       |
|       | ES10          |       |      | 18    |                  | 5.6   |       | 1.1   |                  | 1.1   |     | 75.3  |      |          |      | 1.1   |                  | 18.9  |       | 1.1  |     | 60               |       | 1.1  |       |
|       | ES16          |       |      | 41.3  |                  | 26.1  |       |       |                  | 32.6  |     |       |      |          | 2.2  |       | 26.7             |       | 15.6  |      |     | 46.7             |       | 1.1  |       |
|       | ES18          |       |      | 84.9  |                  | 4.3   |       |       |                  | 10.8  |     |       |      |          |      |       |                  | 12.2  |       |      |     | 46.7             |       | 12.2 |       |
|       | ES19          |       |      | 3.3   |                  | 96.7  |       |       |                  |       |     |       |      |          |      |       | 68.1             |       | 23.4  | 5.3  |     | 1.1              |       |      |       |
|       | ES24          |       |      |       |                  | 90.58 |       | 9.41  |                  |       |     |       |      |          |      |       | 20.51            |       |       |      |     | 79.48            |       | 3.44 |       |
|       | ES34          |       |      |       |                  |       |       |       |                  | 45    |     | 55    |      |          | 2.1  |       |                  |       |       |      |     | 87.35            |       | 9.19 |       |
|       | Dye5          | ES1   |      | 2.27  | 75               |       |       | 20.45 |                  |       |     |       |      |          |      |       | 55.90            |       | 31.08 |      |     |                  | 10.81 |      |       |
|       |               | ES2   |      | 3.2   |                  |       |       |       |                  |       |     |       |      |          |      |       |                  |       |       |      |     |                  |       |      |       |
| ES12  |               |       | 3.5  | 75.3  |                  |       | 4.7   |       |                  | 4.3   |     | 11.8  |      |          |      | 8.4   |                  | 6.3   |       |      |     | 63.2             | 21.1  | 17.4 |       |
| ES15  |               |       |      | 2.1   |                  | 97.8  |       |       |                  |       |     |       |      |          |      |       |                  |       |       |      |     | 81.5             |       |      |       |
| ES17  |               |       |      | 10.8  |                  | 89.2  |       |       |                  |       |     |       |      |          |      | 2     |                  | 72.7  |       | 5    |     | 76.3             |       | 22.7 |       |
| ES20  |               |       |      | 80    |                  |       | 88.9  |       |                  |       |     | 77.8  |      |          |      | 1     |                  |       |       |      |     | 79.8             |       | 16.8 |       |
| ES23  |               |       |      | 43.33 |                  | 40    |       | 2.22  |                  | 33.2  |     |       |      |          |      |       | 42.85            |       | 10.98 | 4.39 |     | 41.75            |       |      |       |
| ES25  |               |       |      |       | 3.90             | 26.13 |       | 9.09  |                  | 64.77 |     |       |      |          |      |       | 43.82            |       | 16.85 | 4.49 |     | 34.83            |       |      |       |
| Dye6  | ES1           |       | 2.4  | 78.6  |                  |       | 14.3  |       |                  |       |     |       |      |          |      | 53.4  |                  | 25    |       |      |     | 13.6             |       | 2.3  |       |
|       | ES2           |       | 3.4  | 73.9  |                  |       |       |       |                  |       |     |       |      |          |      | 2.3   |                  | 2.3   |       |      |     | 70.4             |       | 25   |       |
|       | ES3           |       |      | 52.2  |                  | 17.4  |       | 2.2   |                  |       |     |       |      |          |      | 80.2  |                  |       |       |      |     | 2.2              |       | 13.2 |       |
|       | ES5           |       |      | 10.5  |                  | 41.9  |       |       |                  |       |     |       |      |          |      |       |                  |       |       |      |     | 63.7             |       | 15.4 |       |
|       | ES9           |       |      | 12.9  |                  | 44.7  |       |       |                  |       |     |       |      |          |      |       |                  |       |       |      |     | 60               |       | 15.3 |       |
|       | ES17          |       | 1.1  | 75    |                  | 23.9  |       |       |                  |       |     |       |      |          |      |       |                  |       |       |      |     | 67.8             |       | 27.6 |       |
|       | ES18          |       |      | 2.2   |                  | 97.8  |       |       |                  |       |     |       |      |          |      |       |                  |       |       |      |     | 17.7             |       |      |       |
|       | ES25          |       |      | 33.69 |                  | 58.69 |       | 5.43  |                  | 2.17  |     |       |      |          |      |       | 48.38            |       | 10.75 | 4.30 |     | 36.55            |       |      |       |
|       | ES40          |       |      |       |                  |       |       |       |                  | 29.48 |     | 70.57 |      |          |      |       |                  |       |       |      |     | 90.69            |       | 8.13 |       |
|       |               |       |      |       |                  |       |       |       |                  |       |     |       |      |          |      |       |                  |       |       |      |     |                  |       |      | 1.16  |
